# Supplementary material for: Novel chemical route for atomic layer deposition of MoS2 thin film on SiO2/Si substrate
Source: Royal Society of Chemistry journal article supplement (doi:10.1039/c4nr04816d), 2014-01-01
Supplement: c4nr04816d1.pdf [file c4nr04816d1.pdf]

Electronic Supplementary Information

**Novel chemical route for atomic layer deposition of MoS<sub>2</sub> thin film on SiO<sub>2</sub>/Si substrate**

*Zhenyu Jin, Seokhee Shin, Do Hyun Kwon, Seung-Joo Han and Yo-Sep Min\**

Department of Chemical Engineering, Konkuk University, 120 Neungdong-Ro, Gwangjin-Gu, Seoul 143-701, Korea

\*E-mail: ysmin@konkuk.ac.kr

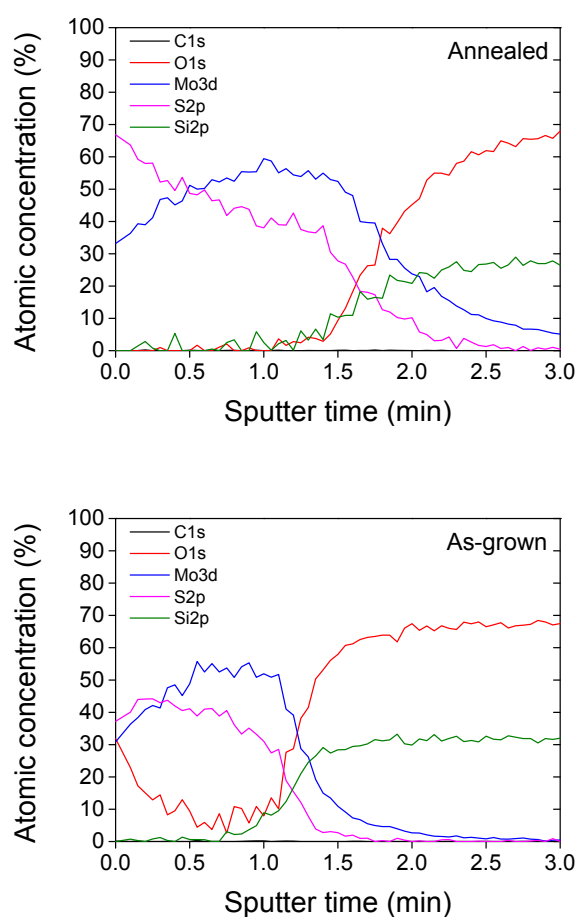

**Figure S1.** XPS depth profiles of the as-grown and the annealed MoS<sub>2</sub> thin films on SiO<sub>2</sub>/Si.

Both films were sputtered by 2 keV Ar<sup>+</sup> for the depth profiling.
